# Supplementary material for: Murine Oviductosomes (OVS) microRNA profiling during the estrous cycle: Delivery of OVS-borne microRNAs to sperm where miR-34c-5p localizes at the centrosome
Source: PubMed Central journal article supplement (PMC6208369; doi:10.1038/s41598-018-34409-4), 2018-10-31
Supplement: 41598_2018_34409_MOESM1_ESM.pdf [file 41598_2018_34409_MOESM1_ESM.pdf]

**Manuscript Title: Murine Oviductosomes (OVS) microRNA profiling during the estrous cycle: Delivery of OVS-borne microRNAs to sperm where *miR-34c-5p* localizes at the centrosome**

Zeinab Fereshteh<sup>1</sup>, Skye A. Schmidt<sup>2</sup>, Amal A. Al-Dossary<sup>1,3</sup>, Monica Accerbi<sup>2</sup>, Cecilia Arighi<sup>4</sup>, Julie Cowart<sup>4</sup>, Jia L. Song<sup>1</sup>, Pamela J. Green<sup>2</sup>, Kyungmin Choi<sup>5</sup>, Soonmoon Yoo<sup>5</sup> and Patricia A. Martin-DeLeon<sup>1</sup>

<sup>1</sup>Department of Biological Sciences, University of Delaware, Newark, DE 19716, USA

<sup>2</sup>Department of Plant and Soil Sciences, Delaware Biotechnology Institute, University of Delaware, Newark, DE 19711, USA

<sup>3</sup>Present Address: Department of Biology, College of Medicine, Imam Abdulrahman Bin Faisal University, P.O. Box 1982, Dammam 31441, Saudi Arabia

<sup>4</sup>Center for Bioinformatics and Computational Biology, University of Delaware, Newark, DE 19711, USA

<sup>5</sup>A.I. DuPont Hospital for Children, 1600 Rockland Rd, Wilmington, Delaware 19803, USA

- Corresponding author: 219 McKinly Lab, Univ. Delaware, Newark, DE 19716, USA, Tel: 302- 831-2249: Fax: 302-831-2281, [pdeleon@udel.edu](mailto:pdeleon@udel.edu)

- 

Running Title: The microRNA repertoire of oviductosomes includes microRNAs present in sperm

**A**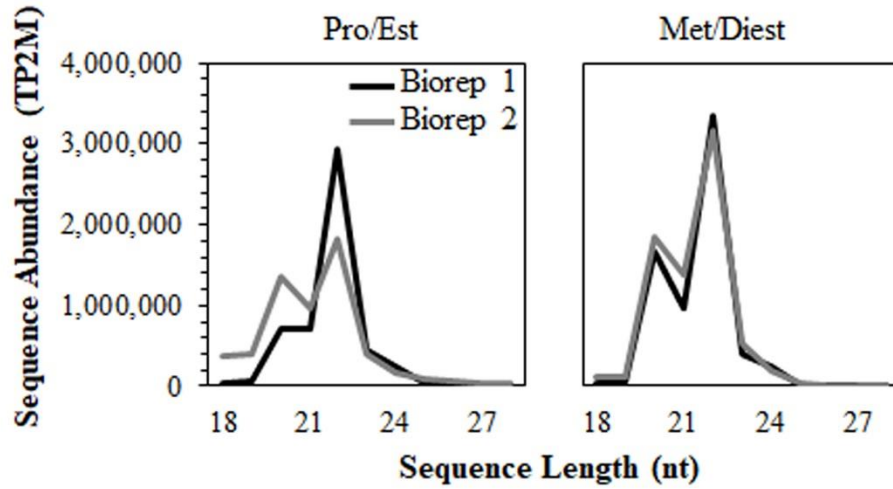**B**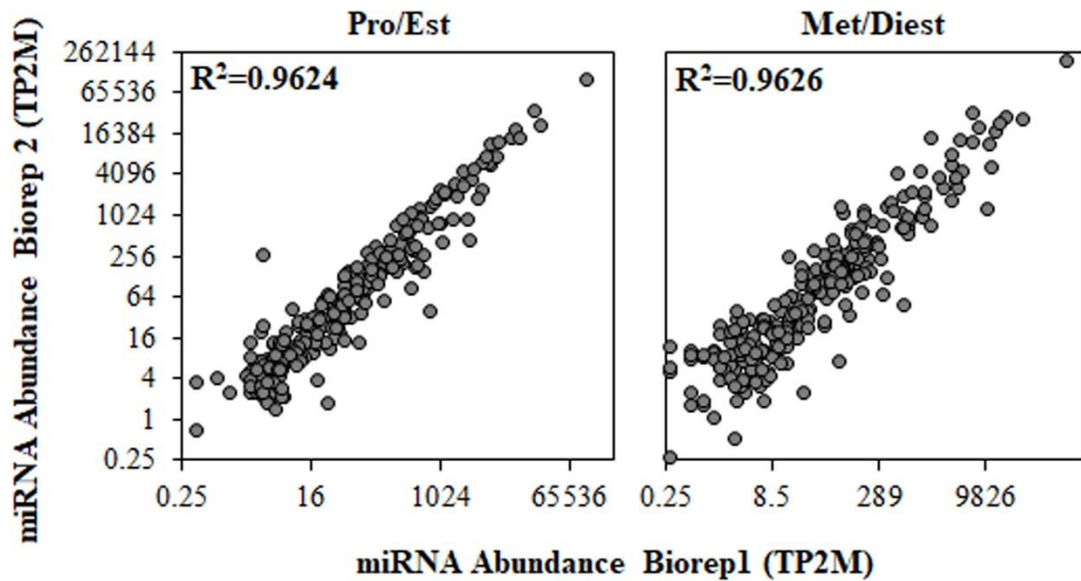

**Fig. S1.** Evaluation of the sequencing data after normalization shows good agreement between biological replicates for **A)** the sequence size profile and **B)** miRNA sequence abundance, for Pro/Est and Met/Diest samples. A strong positive correlation is shown in B.

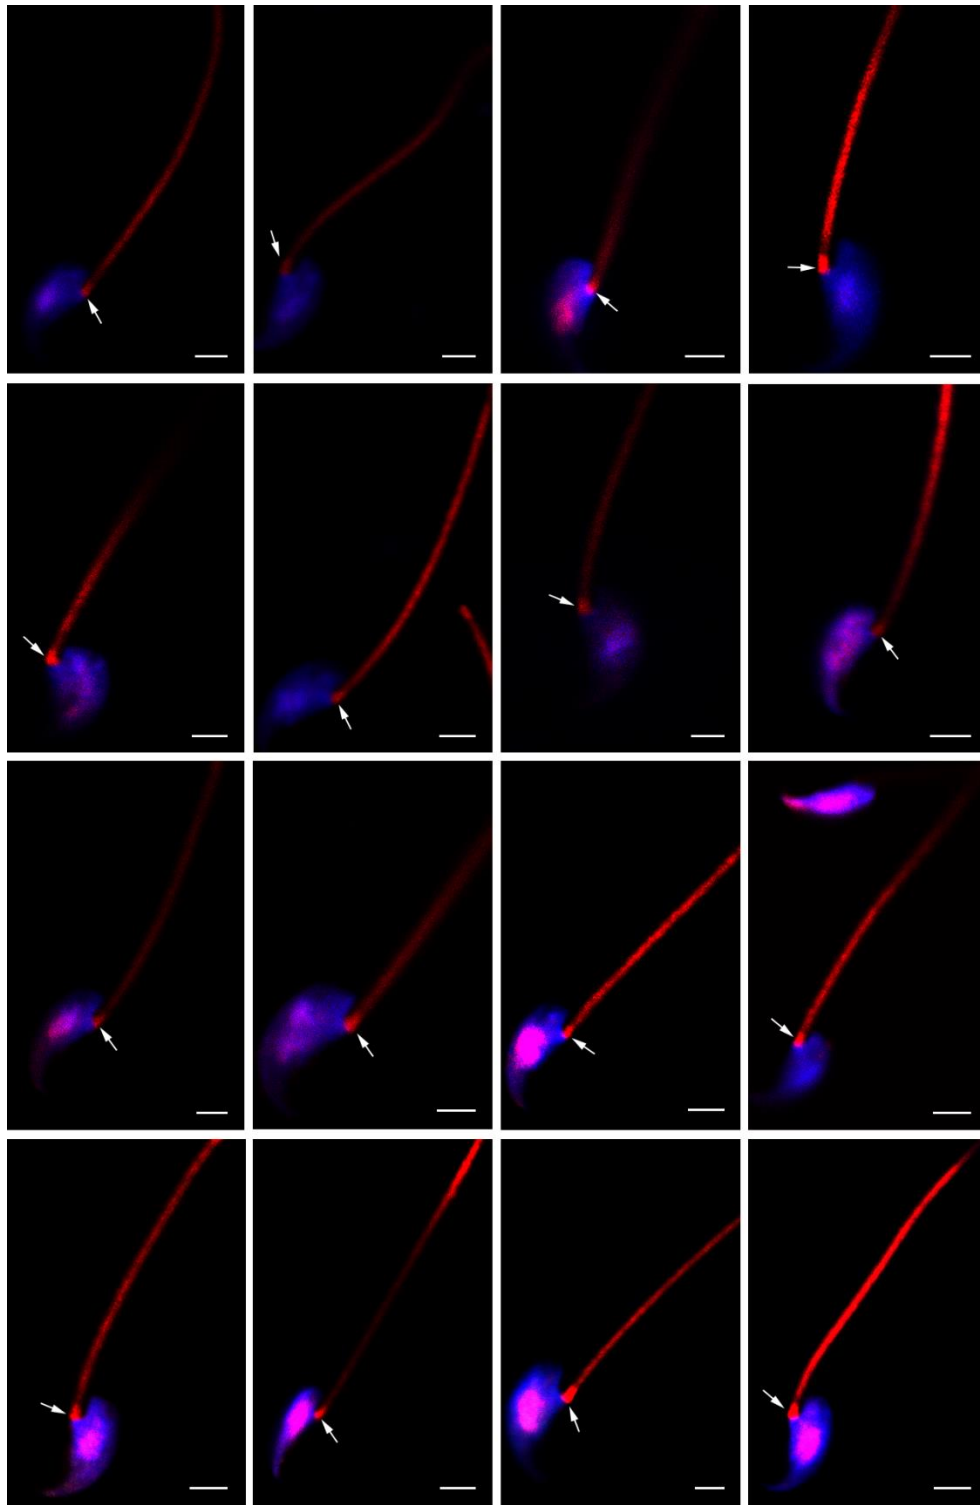

**Fig. S2-** Snapshot of 12 sperm after co-incubation with labeled *miR-34c-5p*. All show the red label localized at a high intensity at/near the centrosome (arrowed) after the miRNA internalization. Scale bars = 2  $\mu$ m

**Fig. S3.** Videos showing the internalization of the labeled miRNAs in 3D reconstructions

Video S3a: 3D volume rendering of a series of maximum intensity projections of a sperm co-incubated with OVS loaded with labeled *miR-143-3p* and *miR-34c-5p*

Video S3b: 3D volume rendering of a series of maximum intensity projections of a control sperm co-incubated with medium with free labeled miRNAs.

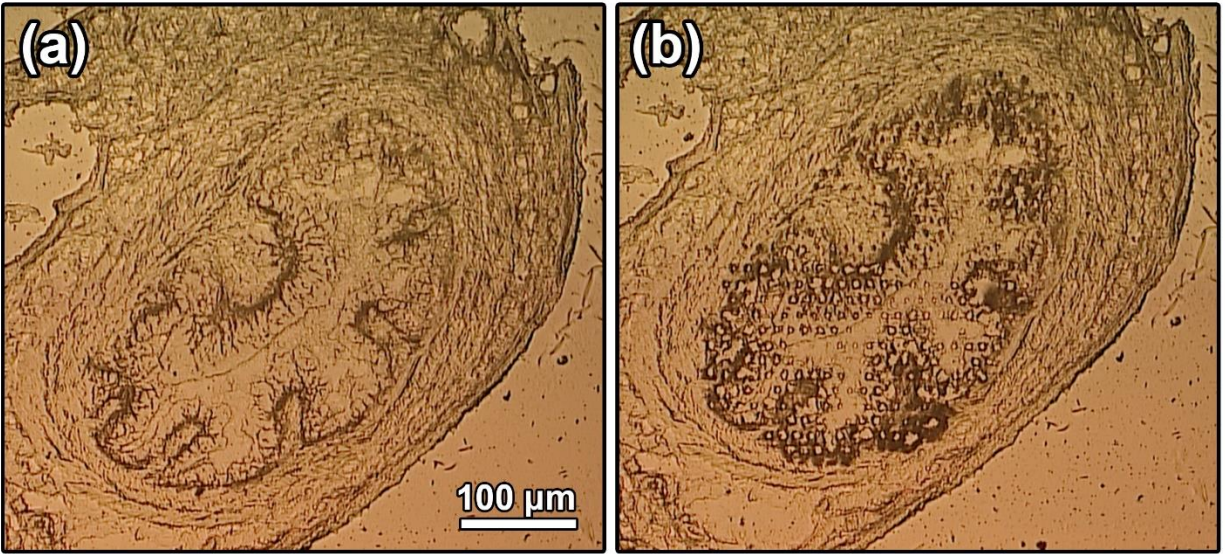

**Fig. S4- LM-Mediated isolation of epithelial cells from 20 μm thick sections of the oviductal tissue. a)** shows a cross-section of the oviductal tissue before and **b)** after microdissected.

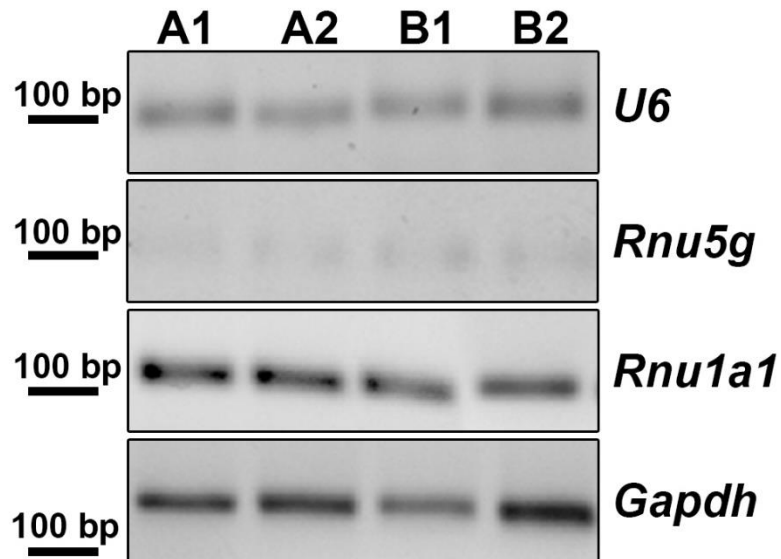

**Fig. S5- Selecting an endogenous control from four RNAs.** Four endogenous transcripts, *U6 snRNA*, *Rnu1a1A1*, *Rnu5g*, and *Gapdh*, were used to find the best internal control for the samples. There were two bioreplicates of purified OVS from pro/estrus (A) and met/diestrus (B). Gel electrophoresis of the RT-PCR products of ~ 100 bp are seen on 2% agarose gel stained with ethidium bromide. *U6 snRNA* was selected to normalize all samples, due to being consistent with all samples.

**Table S1**

| <b>miRNA</b>            | <b>A Bio1<br/>Abundance<br/>(TP2M)</b> | <b>A Bio2<br/>Abundance<br/>(TP2M)</b> | <b>B Bio1<br/>Abundance<br/>(TP2M)</b> | <b>B Bio2<br/>Abundance<br/>(TP2M)</b> | <b>Fold<br/>Change<br/>Bio1 (A/B)</b> | <b>Fold<br/>Change<br/>Bio2 (A/B)</b> | <b>Log2 Fold<br/>Change<br/>Bio1</b> | <b>Log2 Fold<br/>Change<br/>Bio2</b> |
|-------------------------|----------------------------------------|----------------------------------------|----------------------------------------|----------------------------------------|---------------------------------------|---------------------------------------|--------------------------------------|--------------------------------------|
| <b>mmu-miR-451a</b>     | 3.4416                                 | 271.2108                               | 0.2952                                 | 11.8492                                | 11.6585                               | 22.8885                               | 3.5433                               | 4.5166                               |
| <b>mmu-miR-1940</b>     | 3.4416                                 | 2.0916                                 | 0.2952                                 | 0.2693                                 | 11.6585                               | 7.7668                                | 3.5433                               | 2.9573                               |
| <b>mmu-miR-488-3p</b>   | 2.2944                                 | 2.4402                                 | 2.3616                                 | 0.5386                                 | 0.9715                                | 4.5306                                | -0.0416                              | 2.1797                               |
| <b>mmu-miR-3107-5p</b>  | 425.6112                               | 298.4016                               | 319.9968                               | 69.2101                                | 1.3300                                | 4.3115                                | 0.4115                               | 2.1082                               |
| <b>mmu-miR-1843a-3p</b> | 8.7952                                 | 11.1552                                | 5.0184                                 | 3.5009                                 | 1.7526                                | 3.1864                                | 0.8095                               | 1.6719                               |
| <b>mmu-miR-541-5p</b>   | 57.36                                  | 32.7684                                | 10.9224                                | 11.3106                                | 5.2516                                | 2.8971                                | 2.3928                               | 1.5346                               |
| <b>mmu-miR-350-3p</b>   | 52.7712                                | 68.6742                                | 1.476                                  | 24.237                                 | 35.7528                               | 2.8334                                | 5.1600                               | 1.5026                               |
| <b>mmu-miR-30c-2-3p</b> | 4.5888                                 | 12.8982                                | 4.428                                  | 4.5781                                 | 1.0363                                | 2.8174                                | 0.0515                               | 1.4943                               |
| <b>mmu-miR-15b-5p</b>   | 8.4128                                 | 42.1806                                | 1.476                                  | 17.7738                                | 5.6997                                | 2.3732                                | 2.5109                               | 1.2468                               |
| <b>mmu-miR-185-5p</b>   | 3.824                                  | 2.4402                                 | 1.1808                                 | 1.0772                                 | 3.2385                                | 2.2653                                | 1.6953                               | 1.1797                               |
| <b>mmu-miR-31-3p</b>    | 45.888                                 | 36.603                                 | 16.8264                                | 16.6966                                | 2.7271                                | 2.1922                                | 1.4474                               | 1.1324                               |
| <b>mmu-miR-125a-3p</b>  | 4.2064                                 | 3.486                                  | 0.5904                                 | 1.6158                                 | 7.1247                                | 2.1574                                | 2.8328                               | 1.1093                               |
| <b>mmu-miR-339-5p</b>   | 2.2944                                 | 4.8804                                 | 0.5904                                 | 2.4237                                 | 3.8862                                | 2.0136                                | 1.9584                               | 1.0098                               |
| <b>mmu-miR-32-5p</b>    | 2.6768                                 | 3.1374                                 | 0.8856                                 | 1.6158                                 | 3.0226                                | 1.9417                                | 1.5958                               | 0.9573                               |
| <b>mmu-miR-148b-5p</b>  | 8.0304                                 | 7.3206                                 | 4.1328                                 | 3.7702                                 | 1.9431                                | 1.9417                                | 0.9584                               | 0.9573                               |
| <b>mmu-miR-34c-3p</b>   | 11.472                                 | 13.944                                 | 2.3616                                 | 7.2711                                 | 4.8577                                | 1.9177                                | 2.2803                               | 0.9394                               |
| <b>mmu-miR-141-3p</b>   | 71.8912                                | 13.2468                                | 76.4568                                | 7.2711                                 | 0.9403                                | 1.8218                                | -0.0888                              | 0.8654                               |
| <b>mmu-miR-125a-5p</b>  | 48.9472                                | 133.8624                               | 31.2912                                | 73.7882                                | 1.5642                                | 1.8141                                | 0.6455                               | 0.8593                               |
| <b>mmu-miR-301b-3p</b>  | 5.3536                                 | 5.5776                                 | 2.6568                                 | 3.2316                                 | 2.0151                                | 1.7260                                | 1.0108                               | 0.7874                               |
| <b>mmu-miR-92a-3p</b>   | 135.3696                               | 162.099                                | 94.464                                 | 93.9857                                | 1.4330                                | 1.7247                                | 0.5191                               | 0.7864                               |
| <b>mmu-miR-92b-3p</b>   | 18.7376                                | 18.1272                                | 9.7416                                 | 10.772                                 | 1.9235                                | 1.6828                                | 0.9437                               | 0.7509                               |
| <b>mmu-miR-30b-5p</b>   | 728.8544                               | 1358.4942                              | 229.3704                               | 826.751                                | 3.1776                                | 1.6432                                | 1.6680                               | 0.7165                               |
| <b>mmu-miR-872-5p</b>   | 47.4176                                | 38.346                                 | 49.0032                                | 23.4291                                | 0.9676                                | 1.6367                                | -0.0475                              | 0.7108                               |
| <b>mmu-miR-191-5p</b>   | 5069.8592                              | 5414.1066                              | 3666.384                               | 3367.8658                              | 1.3828                                | 1.6076                                | 0.4676                               | 0.6849                               |
| <b>mmu-miR-425-5p</b>   | 3.824                                  | 7.6692                                 | 1.7712                                 | 4.8474                                 | 2.1590                                | 1.5821                                | 1.1104                               | 0.6619                               |
| <b>mmu-miR-154-5p</b>   | 6.1184                                 | 11.5038                                | 5.0184                                 | 7.5404                                 | 1.2192                                | 1.5256                                | 0.2859                               | 0.6094                               |
| <b>mmu-miR-511-3p</b>   | 5.736                                  | 12.201                                 | 0.8856                                 | 8.079                                  | 6.4770                                | 1.5102                                | 2.6953                               | 0.5948                               |

|                          |           |           |            |           |        |        |         |        |
|--------------------------|-----------|-----------|------------|-----------|--------|--------|---------|--------|
| <b>mmu-miR-106b-5p</b>   | 53.1536   | 150.9438  | 32.7672    | 101.5261  | 1.6222 | 1.4867 | 0.6979  | 0.5722 |
| <b>mmu-miR-574-3p</b>    | 306.6848  | 204.9768  | 81.18      | 140.8439  | 3.7778 | 1.4553 | 1.9176  | 0.5414 |
| <b>mmu-miR-376b-3p</b>   | 4.5888    | 13.2468   | 2.952      | 9.1562    | 1.5545 | 1.4468 | 0.6364  | 0.5328 |
| <b>mmu-miR-200b-5p</b>   | 14.5312   | 19.5216   | 10.0368    | 13.7343   | 1.4478 | 1.4214 | 0.5339  | 0.5073 |
| <b>mmu-miR-200b-3p</b>   | 185.0816  | 179.8776  | 64.6488    | 126.8403  | 2.8629 | 1.4181 | 1.5175  | 0.5040 |
| <b>mmu-miR-375-3p</b>    | 119.3088  | 176.043   | 79.1136    | 127.3789  | 1.5081 | 1.3820 | 0.5927  | 0.4668 |
| <b>mmu-miR-3068-5p</b>   | 3.824     | 5.5776    | 1.7712     | 4.0395    | 2.1590 | 1.3808 | 1.1104  | 0.4655 |
| <b>mmu-miR-31-5p</b>     | 258.8848  | 307.8138  | 200.4408   | 224.3269  | 1.2916 | 1.3722 | 0.3691  | 0.4565 |
| <b>mmu-miR-450b-5p</b>   | 6.5008    | 12.8982   | 1.1808     | 9.4255    | 5.5054 | 1.3684 | 2.4609  | 0.4525 |
| <b>mmu-miR-30c-5p</b>    | 1528.4528 | 901.4796  | 777.2616   | 662.2087  | 1.9665 | 1.3613 | 0.9756  | 0.4450 |
| <b>mmu-miR-200a-3p</b>   | 185.464   | 299.796   | 113.9472   | 222.9804  | 1.6276 | 1.3445 | 0.7028  | 0.4271 |
| <b>mmu-miR-376c-3p</b>   | 2.2944    | 13.5954   | 1.1808     | 10.2334   | 1.9431 | 1.3285 | 0.9584  | 0.4098 |
| <b>mmu-miR-34b-3p</b>    | 36.7104   | 31.0254   | 21.5496    | 23.4291   | 1.7035 | 1.3242 | 0.7685  | 0.4051 |
| <b>mmu-miR-192-5p</b>    | 2779.2832 | 3423.9492 | 3860.6256  | 2586.8958 | 0.7199 | 1.3236 | -0.4741 | 0.4044 |
| <b>mmu-miR-3068-3p</b>   | 2.6768    | 2.4402    | 0.8856     | 1.8851    | 3.0226 | 1.2945 | 1.5958  | 0.3724 |
| <b>mmu-miR-221-5p</b>    | 8.4128    | 8.0178    | 3.8376     | 6.1939    | 2.1922 | 1.2945 | 1.1324  | 0.3724 |
| <b>mmu-miR-411-5p</b>    | 126.5744  | 344.7654  | 120.7368   | 268.4921  | 1.0483 | 1.2841 | 0.0681  | 0.3607 |
| <b>mmu-miR-34c-5p</b>    | 3885.5664 | 2426.9532 | 1324.8576  | 1893.4483 | 2.9328 | 1.2818 | 1.5523  | 0.3581 |
| <b>mmu-miR-429-3p</b>    | 331.9232  | 393.2208  | 175.644    | 308.8871  | 1.8897 | 1.2730 | 0.9182  | 0.3483 |
| <b>mmu-miR-351-5p</b>    | 7.2656    | 19.8702   | 3.5424     | 15.6194   | 2.0510 | 1.2721 | 1.0364  | 0.3473 |
| <b>mmu-miR-582-3p</b>    | 6.5008    | 14.2926   | 14.1696    | 11.5799   | 0.4588 | 1.2343 | -1.1241 | 0.3036 |
| <b>mmu-miR-16-5p</b>     | 1014.5072 | 2352.7014 | 647.6688   | 1907.9905 | 1.5664 | 1.2331 | 0.6475  | 0.3023 |
| <b>mmu-miR-30e-3p</b>    | 163.2848  | 240.8826  | 138.1536   | 195.5118  | 1.1819 | 1.2321 | 0.2411  | 0.3011 |
| <b>mmu-miR-125b-2-3p</b> | 5.736     | 12.8982   | 5.0184     | 10.5027   | 1.1430 | 1.2281 | 0.1928  | 0.2964 |
| <b>mmu-miR-19a-3p</b>    | 31.3568   | 34.5114   | 14.76      | 28.2765   | 2.1244 | 1.2205 | 1.0871  | 0.2875 |
| <b>mmu-let-7g-5p</b>     | 818.336   | 1559.6364 | 10722.2544 | 1280.2522 | 0.0763 | 1.2182 | -3.7118 | 0.2848 |
| <b>mmu-miR-204-5p</b>    | 592.3376  | 151.2924  | 368.4096   | 124.4166  | 1.6078 | 1.2160 | 0.6851  | 0.2822 |
| <b>mmu-miR-138-5p</b>    | 23.3264   | 57.8676   | 11.808     | 47.6661   | 1.9755 | 1.2140 | 0.9822  | 0.2798 |
| <b>mmu-miR-200c-3p</b>   | 391.5776  | 381.0198  | 117.1944   | 314.0038  | 3.3413 | 1.2134 | 1.7404  | 0.2791 |
| <b>mmu-miR-301a-3p</b>   | 279.5344  | 390.0834  | 143.172    | 322.6214  | 1.9524 | 1.2091 | 0.9653  | 0.2739 |
| <b>mmu-miR-421-3p</b>    | 3.0592    | 4.5318    | 1.476      | 3.7702    | 2.0726 | 1.2020 | 1.0515  | 0.2654 |



|                         |            |            |           |            |        |        |         |        |
|-------------------------|------------|------------|-----------|------------|--------|--------|---------|--------|
| <b>mmu-miR-182-5p</b>   | 607.6336   | 270.8622   | 301.104   | 226.212    | 2.0180 | 1.1974 | 1.0129  | 0.2599 |
| <b>mmu-miR-30a-3p</b>   | 136.8992   | 198.0048   | 104.5008  | 167.5046   | 1.3100 | 1.1821 | 0.3896  | 0.2413 |
| <b>mmu-miR-423-3p</b>   | 96.3648    | 87.4986    | 39.5568   | 74.3268    | 2.4361 | 1.1772 | 1.2846  | 0.2354 |
| <b>mmu-miR-299a-5p</b>  | 0.3824     | 3.486      | 5.6088    | 2.9623     | 0.0682 | 1.1768 | -3.8745 | 0.2349 |
| <b>mmu-miR-96-5p</b>    | 39.0048    | 17.7786    | 11.2176   | 15.3501    | 3.4771 | 1.1582 | 1.7979  | 0.2119 |
| <b>mmu-miR-125b-5p</b>  | 302.8608   | 717.4188   | 114.5376  | 622.8909   | 2.6442 | 1.1518 | 1.4028  | 0.2038 |
| <b>mmu-miR-425-3p</b>   | 3.824      | 2.7888     | 3.5424    | 2.4237     | 1.0795 | 1.1506 | 0.1104  | 0.2024 |
| <b>mmu-miR-15a-5p</b>   | 19.8848    | 34.86      | 2.6568    | 30.4309    | 7.4845 | 1.1455 | 2.9039  | 0.1960 |
| <b>mmu-miR-423-5p</b>   | 24.0912    | 29.9796    | 7.6752    | 26.6607    | 3.1388 | 1.1245 | 1.6502  | 0.1693 |
| <b>mmu-miR-3102-3p</b>  | 9.1776     | 11.5038    | 2.952     | 10.2334    | 3.1089 | 1.1241 | 1.6364  | 0.1688 |
| <b>mmu-miR-383-5p</b>   | 5.736      | 4.5318     | 3.8376    | 4.0395     | 1.4947 | 1.1219 | 0.5798  | 0.1659 |
| <b>mmu-miR-10a-5p</b>   | 4635.0704  | 6098.757   | 3266.388  | 5478.1006  | 1.4190 | 1.1133 | 0.5049  | 0.1548 |
| <b>mmu-miR-495-3p</b>   | 6.5008     | 2.0916     | 2.6568    | 1.8851     | 2.4469 | 1.1095 | 1.2909  | 0.1500 |
| <b>mmu-miR-674-3p</b>   | 4.5888     | 8.3664     | 2.3616    | 7.5404     | 1.9431 | 1.1095 | 0.9584  | 0.1500 |
| <b>mmu-miR-298-5p</b>   | 4.2064     | 2.0916     | 6.4944    | 1.8851     | 0.6477 | 1.1095 | -0.6266 | 0.1500 |
| <b>mmu-miR-130b-3p</b>  | 8.4128     | 8.0178     | 3.2472    | 7.2711     | 2.5908 | 1.1027 | 1.3734  | 0.1410 |
| <b>mmu-miR-1843b-5p</b> | 5.736      | 13.5954    | 4.7232    | 12.3878    | 1.2144 | 1.0975 | 0.2803  | 0.1342 |
| <b>mmu-miR-126a-3p</b>  | 253.9136   | 736.5918   | 149.3712  | 674.8658   | 1.6999 | 1.0915 | 0.7654  | 0.1263 |
| <b>mmu-miR-150-5p</b>   | 48.1824    | 112.9464   | 38.0808   | 103.6805   | 1.2653 | 1.0894 | 0.3394  | 0.1235 |
| <b>mmu-miR-26a-5p</b>   | 19975.4288 | 35930.5506 | 6204.2184 | 33019.6809 | 3.2197 | 1.0882 | 1.6869  | 0.1219 |
| <b>mmu-miR-152-3p</b>   | 444.3488   | 168.7224   | 93.5784   | 155.3861   | 4.7484 | 1.0858 | 2.2474  | 0.1188 |
| <b>mmu-miR-361-5p</b>   | 44.3584    | 42.5292    | 13.8744   | 39.3178    | 3.1971 | 1.0817 | 1.6768  | 0.1133 |
| <b>mmu-miR-142-3p</b>   | 27.5328    | 67.977     | 15.6456   | 63.2855    | 1.7598 | 1.0741 | 0.8154  | 0.1032 |
| <b>mmu-let-7a-1-3p</b>  | 18.3552    | 24.7506    | 5.6088    | 23.1598    | 3.2726 | 1.0687 | 1.7104  | 0.0958 |
| <b>mmu-miR-1249-3p</b>  | 11.0896    | 14.6412    | 2.952     | 13.7343    | 3.7566 | 1.0660 | 1.9094  | 0.0923 |
| <b>mmu-miR-135a-5p</b>  | 42.064     | 42.1806    | 11.5128   | 39.5871    | 3.6537 | 1.0655 | 1.8693  | 0.0915 |
| <b>mmu-miR-326-3p</b>   | 12.6192    | 30.3282    | 3.8376    | 28.5458    | 3.2883 | 1.0624 | 1.7173  | 0.0874 |
| <b>mmu-miR-148a-5p</b>  | 62.7136    | 104.58     | 50.184    | 98.5638    | 1.2497 | 1.0610 | 0.3216  | 0.0855 |
| <b>mmu-miR-374b-5p</b>  | 99.424     | 281.3202   | 47.5272   | 268.2228   | 2.0919 | 1.0488 | 1.0648  | 0.0688 |
| <b>mmu-miR-744-3p</b>   | 3.0592     | 7.3206     | 1.476     | 7.0018     | 2.0726 | 1.0455 | 1.0515  | 0.0642 |
| <b>mmu-miR-1247-5p</b>  | 8.4128     | 9.7608     | 1.1808    | 9.4255     | 7.1247 | 1.0356 | 2.8328  | 0.0504 |

|                        |           |           |           |           |         |        |         |         |
|------------------------|-----------|-----------|-----------|-----------|---------|--------|---------|---------|
| <b>mmu-miR-30d-5p</b>  | 159.0784  | 247.1574  | 97.1208   | 239.1384  | 1.6379  | 1.0335 | 0.7119  | 0.0476  |
| <b>mmu-miR-186-5p</b>  | 385.0768  | 328.0326  | 141.696   | 318.3126  | 2.7176  | 1.0305 | 1.4423  | 0.0434  |
| <b>mmu-miR-652-3p</b>  | 43.2112   | 44.6208   | 28.6344   | 43.3573   | 1.5091  | 1.0291 | 0.5937  | 0.0414  |
| <b>mmu-miR-205-5p</b>  | 19.8848   | 34.86     | 112.4712  | 33.9318   | 0.1768  | 1.0274 | -2.4998 | 0.0389  |
| <b>mmu-let-7f-2-3p</b> | 3.0592    | 6.6234    | 1.476     | 6.4632    | 2.0726  | 1.0248 | 1.0515  | 0.0353  |
| <b>mmu-miR-18a-5p</b>  | 37.4752   | 21.9618   | 2.952     | 21.544    | 12.6949 | 1.0194 | 3.6662  | 0.0277  |
| <b>mmu-miR-30d-3p</b>  | 10.3248   | 24.7506   | 13.8744   | 24.5063   | 0.7442  | 1.0100 | -0.4263 | 0.0143  |
| <b>mmu-let-7i-3p</b>   | 10.3248   | 28.5852   | 5.904     | 28.8151   | 1.7488  | 0.9920 | 0.8063  | -0.0116 |
| <b>mmu-miR-17-5p</b>   | 60.4192   | 93.7734   | 48.4128   | 95.6015   | 1.2480  | 0.9809 | 0.3196  | -0.0279 |
| <b>mmu-miR-141-5p</b>  | 16.8256   | 9.7608    | 6.1992    | 9.9641    | 2.7142  | 0.9796 | 1.4405  | -0.0297 |
| <b>mmu-miR-329-3p</b>  | 3.0592    | 6.972     | 1.7712    | 7.2711    | 1.7272  | 0.9589 | 0.7884  | -0.0606 |
| <b>mmu-miR-194-5p</b>  | 97.8944   | 130.0278  | 29.8152   | 136.2658  | 3.2834  | 0.9542 | 1.7152  | -0.0676 |
| <b>mmu-miR-455-3p</b>  | 8.4128    | 9.7608    | 0.5904    | 10.2334   | 14.2493 | 0.9538 | 3.8328  | -0.0682 |
| <b>mmu-miR-100-5p</b>  | 260.7968  | 220.6638  | 144.3528  | 232.4059  | 1.8067  | 0.9495 | 0.8533  | -0.0748 |
| <b>mmu-miR-139-5p</b>  | 7.648     | 7.6692    | 1.476     | 8.079     | 5.1816  | 0.9493 | 2.3734  | -0.0751 |
| <b>mmu-miR-181a-5p</b> | 1659.2336 | 2402.2026 | 2419.4592 | 2553.7719 | 0.6858  | 0.9406 | -0.5442 | -0.0883 |
| <b>mmu-miR-148b-3p</b> | 469.5872  | 182.3178  | 73.2096   | 195.5118  | 6.4143  | 0.9325 | 2.6813  | -0.1008 |
| <b>mmu-miR-23b-3p</b>  | 184.6992  | 180.9234  | 85.608    | 195.2425  | 2.1575  | 0.9267 | 1.1094  | -0.1099 |
| <b>mmu-miR-142-5p</b>  | 511.6512  | 1236.4842 | 378.7416  | 1342.9991 | 1.3509  | 0.9207 | 0.4339  | -0.1192 |
| <b>mmu-miR-20a-5p</b>  | 69.5968   | 140.4858  | 66.7152   | 152.9624  | 1.0432  | 0.9184 | 0.0610  | -0.1228 |
| <b>mmu-let-7d-3p</b>   | 94.4528   | 109.4604  | 59.04     | 120.3771  | 1.5998  | 0.9093 | 0.6779  | -0.1372 |
| <b>mmu-miR-136-5p</b>  | 2.2944    | 4.8804    | 2.3616    | 5.386     | 0.9715  | 0.9061 | -0.0416 | -0.1422 |
| <b>mmu-miR-99a-3p</b>  | 7.648     | 8.0178    | 2.952     | 8.8869    | 2.5908  | 0.9022 | 1.3734  | -0.1485 |
| <b>mmu-miR-615-3p</b>  | 6.1184    | 5.5776    | 2.0664    | 6.1939    | 2.9609  | 0.9005 | 1.5660  | -0.1512 |
| <b>mmu-miR-23a-3p</b>  | 161.7552  | 199.3992  | 85.0176   | 221.6339  | 1.9026  | 0.8997 | 0.9280  | -0.1525 |
| <b>mmu-miR-223-3p</b>  | 88.7168   | 147.1092  | 36.3096   | 164.0037  | 2.4433  | 0.8970 | 1.2889  | -0.1568 |
| <b>mmu-miR-151-3p</b>  | 499.032   | 973.9884  | 597.78    | 1092.2808 | 0.8348  | 0.8917 | -0.2605 | -0.1654 |
| <b>mmu-miR-382-5p</b>  | 9.9424    | 7.6692    | 3.8376    | 8.6176    | 2.5908  | 0.8899 | 1.3734  | -0.1682 |
| <b>mmu-miR-344-3p</b>  | 13.7664   | 18.8244   | 7.38      | 21.2747   | 1.8654  | 0.8848 | 0.8995  | -0.1765 |
| <b>mmu-miR-434-5p</b>  | 4.2064    | 5.229     | 1.476     | 5.9246    | 2.8499  | 0.8826 | 1.5109  | -0.1802 |
| <b>mmu-miR-195a-5p</b> | 523.888   | 980.6118  | 91.512    | 1111.4011 | 5.7248  | 0.8823 | 2.5172  | -0.1806 |

|                          |           |           |           |            |        |        |         |         |
|--------------------------|-----------|-----------|-----------|------------|--------|--------|---------|---------|
| <b>mmu-miR-378a-3p</b>   | 358.3088  | 568.5666  | 622.2816  | 646.8586   | 0.5758 | 0.8790 | -0.7964 | -0.1861 |
| <b>mmu-let-7a-5p</b>     | 2054.6352 | 4470.0978 | 11931.984 | 5087.077   | 0.1722 | 0.8787 | -2.5379 | -0.1865 |
| <b>mmu-miR-296-5p</b>    | 7.2656    | 8.0178    | 2.0664    | 9.1562     | 3.5161 | 0.8757 | 1.8140  | -0.1915 |
| <b>mmu-miR-181a-1-3p</b> | 43.2112   | 52.29     | 51.9552   | 59.7846    | 0.8317 | 0.8746 | -0.2659 | -0.1932 |
| <b>mmu-miR-676-3p</b>    | 205.3488  | 305.7222  | 181.548   | 349.8207   | 1.1311 | 0.8739 | 0.1777  | -0.1944 |
| <b>mmu-miR-148a-3p</b>   | 5049.2096 | 11374.818 | 4342.392  | 13037.8902 | 1.1628 | 0.8724 | 0.2176  | -0.1969 |
| <b>mmu-miR-24-2-5p</b>   | 85.6576   | 131.4222  | 49.5936   | 152.9624   | 1.7272 | 0.8592 | 0.7884  | -0.2190 |
| <b>mmu-miR-25-3p</b>     | 1765.9232 | 1919.7402 | 1305.3744 | 2238.9602  | 1.3528 | 0.8574 | 0.4360  | -0.2219 |
| <b>mmu-miR-155-5p</b>    | 14.1488   | 24.402    | 6.1992    | 28.5458    | 2.2824 | 0.8548 | 1.1905  | -0.2263 |
| <b>mmu-miR-210-3p</b>    | 186.2288  | 224.4984  | 92.1024   | 263.6447   | 2.0220 | 0.8515 | 1.0158  | -0.2319 |
| <b>mmu-let-7e-5p</b>     | 403.8144  | 769.3602  | 790.8408  | 907.541    | 0.5106 | 0.8477 | -0.9697 | -0.2383 |
| <b>mmu-miR-669c-5p</b>   | 5.3536    | 5.229     | 5.3136    | 6.1939     | 1.0075 | 0.8442 | 0.0108  | -0.2443 |
| <b>mmu-miR-212-5p</b>    | 1.912     | 4.5318    | 4.1328    | 5.386      | 0.4626 | 0.8414 | -1.1120 | -0.2491 |
| <b>mmu-let-7d-5p</b>     | 555.6272  | 900.4338  | 1185.5232 | 1071.0061  | 0.4687 | 0.8407 | -1.0933 | -0.2503 |
| <b>mmu-miR-484</b>       | 26.0032   | 50.8956   | 19.188    | 60.8618    | 1.3552 | 0.8362 | 0.4385  | -0.2580 |
| <b>mmu-miR-434-3p</b>    | 48.1824   | 141.5316  | 22.14     | 169.659    | 2.1763 | 0.8342 | 1.1219  | -0.2615 |
| <b>mmu-miR-214-3p</b>    | 69.5968   | 82.9668   | 22.14     | 99.9103    | 3.1435 | 0.8304 | 1.6524  | -0.2681 |
| <b>mmu-miR-28a-5p</b>    | 82.5984   | 60.6564   | 42.2136   | 73.5189    | 1.9567 | 0.8250 | 0.9684  | -0.2775 |
| <b>mmu-miR-337-3p</b>    | 4.5888    | 2.4402    | 2.952     | 2.9623     | 1.5545 | 0.8238 | 0.6364  | -0.2797 |
| <b>mmu-let-7b-5p</b>     | 906.288   | 1761.4758 | 850.4712  | 2149.2833  | 1.0656 | 0.8196 | 0.0917  | -0.2871 |
| <b>mmu-miR-127-3p</b>    | 997.2992  | 754.0218  | 1194.6744 | 920.1981   | 0.8348 | 0.8194 | -0.2605 | -0.2873 |
| <b>mmu-miR-222-3p</b>    | 73.8032   | 81.5724   | 60.2208   | 99.9103    | 1.2255 | 0.8165 | 0.2934  | -0.2926 |
| <b>mmu-miR-151-5p</b>    | 204.2016  | 434.3556  | 120.1464  | 533.4833   | 1.6996 | 0.8142 | 0.7652  | -0.2966 |
| <b>mmu-miR-331-3p</b>    | 3.4416    | 6.2748    | 1.1808    | 7.8097     | 2.9146 | 0.8035 | 1.5433  | -0.3157 |
| <b>mmu-miR-320-3p</b>    | 92.9232   | 105.9744  | 92.6928   | 133.0342   | 1.0025 | 0.7966 | 0.0036  | -0.3281 |
| <b>mmu-miR-200a-5p</b>   | 45.888    | 31.7226   | 27.7488   | 39.8564    | 1.6537 | 0.7959 | 0.7257  | -0.3293 |
| <b>mmu-miR-101b-3p</b>   | 47.0352   | 118.1754  | 53.7264   | 148.9229   | 0.8755 | 0.7935 | -0.1919 | -0.3336 |
| <b>mmu-miR-99b-3p</b>    | 8.4128    | 7.6692    | 6.4944    | 9.6948     | 1.2954 | 0.7911 | 0.3734  | -0.3381 |
| <b>mmu-miR-152-5p</b>    | 40.5344   | 48.1068   | 26.8632   | 60.8618    | 1.5089 | 0.7904 | 0.5935  | -0.3393 |
| <b>mmu-miR-29b-3p</b>    | 125.4272  | 254.8266  | 65.8296   | 323.16     | 1.9053 | 0.7885 | 0.9300  | -0.3427 |
| <b>mmu-miR-183-5p</b>    | 724.648   | 38.346    | 673.9416  | 48.7433    | 1.0752 | 0.7867 | 0.1047  | -0.3461 |

|                         |            |            |           |            |        |        |         |         |
|-------------------------|------------|------------|-----------|------------|--------|--------|---------|---------|
| <b>mmu-miR-93-5p</b>    | 322.7456   | 553.5768   | 327.0816  | 705.8353   | 0.9867 | 0.7843 | -0.0193 | -0.3505 |
| <b>mmu-miR-744-5p</b>   | 23.7088    | 23.3562    | 14.4648   | 29.8923    | 1.6391 | 0.7813 | 0.7129  | -0.3560 |
| <b>mmu-miR-133a-3p</b>  | 147.9888   | 142.926    | 72.6192   | 183.3933   | 2.0379 | 0.7793 | 1.0271  | -0.3597 |
| <b>mmu-miR-381-3p</b>   | 60.8016    | 126.1932   | 89.4456   | 162.9265   | 0.6798 | 0.7745 | -0.5569 | -0.3686 |
| <b>mmu-miR-146b-5p</b>  | 159.4608   | 56.8218    | 166.788   | 73.5189    | 0.9561 | 0.7729 | -0.0648 | -0.3717 |
| <b>mmu-miR-218-5p</b>   | 45.1232    | 90.2874    | 70.5528   | 116.8762   | 0.6396 | 0.7725 | -0.6448 | -0.3724 |
| <b>mmu-miR-872-3p</b>   | 113.1904   | 232.1676   | 34.8336   | 300.8081   | 3.2495 | 0.7718 | 1.7002  | -0.3737 |
| <b>mmu-miR-140-5p</b>   | 21.7968    | 49.1526    | 15.3504   | 64.0934    | 1.4199 | 0.7669 | 0.5058  | -0.3829 |
| <b>mmu-miR-328-3p</b>   | 75.7152    | 58.2162    | 63.7632   | 75.9426    | 1.1874 | 0.7666 | 0.2479  | -0.3835 |
| <b>mmu-miR-1843a-5p</b> | 29.0624    | 65.8854    | 34.5384   | 86.4453    | 0.8415 | 0.7622 | -0.2490 | -0.3918 |
| <b>mmu-miR-503-3p</b>   | 6.1184     | 6.972      | 0.8856    | 9.1562     | 6.9088 | 0.7615 | 2.7884  | -0.3932 |
| <b>mmu-miR-532-5p</b>   | 147.224    | 129.3306   | 183.6144  | 169.9283   | 0.8018 | 0.7611 | -0.3187 | -0.3939 |
| <b>mmu-miR-365-3p</b>   | 46.2704    | 128.6334   | 50.184    | 169.1204   | 0.9220 | 0.7606 | -0.1171 | -0.3948 |
| <b>mmu-let-7e-3p</b>    | 5.736      | 5.9262     | 4.1328    | 7.8097     | 1.3879 | 0.7588 | 0.4729  | -0.3982 |
| <b>mmu-miR-126a-5p</b>  | 3952.4864  | 6138.846   | 3109.932  | 8093.0036  | 1.2709 | 0.7585 | 0.3459  | -0.3987 |
| <b>mmu-miR-29a-3p</b>   | 560.9808   | 912.2862   | 176.8248  | 1203.5017  | 3.1725 | 0.7580 | 1.6656  | -0.3997 |
| <b>mmu-miR-467d-3p</b>  | 1.1472     | 2.4402     | 2.3616    | 3.2316     | 0.4858 | 0.7551 | -1.0416 | -0.4052 |
| <b>mmu-miR-149-5p</b>   | 77.6272    | 36.9516    | 97.7112   | 49.0126    | 0.7945 | 0.7539 | -0.3320 | -0.4075 |
| <b>mmu-miR-676-5p</b>   | 29.8272    | 22.659     | 28.044    | 30.1616    | 1.0636 | 0.7513 | 0.0889  | -0.4126 |
| <b>mmu-miR-672-5p</b>   | 90.6288    | 179.8776   | 113.3568  | 239.9463   | 0.7995 | 0.7497 | -0.3228 | -0.4157 |
| <b>mmu-miR-21a-5p</b>   | 25239.5472 | 21749.154  | 20055.888 | 29025.154  | 1.2585 | 0.7493 | 0.3317  | -0.4163 |
| <b>mmu-miR-10b-5p</b>   | 10203.1968 | 14401.7118 | 8150.472  | 19249.2947 | 1.2519 | 0.7482 | 0.3241  | -0.4186 |
| <b>mmu-miR-127-5p</b>   | 4.9712     | 5.5776     | 0.5904    | 7.5404     | 8.4201 | 0.7397 | 3.0738  | -0.4350 |
| <b>mmu-miR-450a-5p</b>  | 18.7376    | 12.5496    | 4.428     | 16.9659    | 4.2316 | 0.7397 | 2.0812  | -0.4350 |
| <b>mmu-miR-190a-3p</b>  | 4.5888     | 5.9262     | 8.5608    | 8.079      | 0.5360 | 0.7335 | -0.8996 | -0.4471 |
| <b>mmu-miR-101a-3p</b>  | 396.1664   | 1127.0238  | 436.6008  | 1545.782   | 0.9074 | 0.7291 | -0.1402 | -0.4558 |
| <b>mmu-miR-455-5p</b>   | 17.208     | 31.7226    | 21.2544   | 43.8959    | 0.8096 | 0.7227 | -0.3047 | -0.4686 |
| <b>mmu-miR-501-3p</b>   | 26.3856    | 1.743      | 23.3208   | 2.4237     | 1.1314 | 0.7191 | 0.1781  | -0.4756 |
| <b>mmu-miR-379-5p</b>   | 28.68      | 11.1552    | 18.8928   | 15.6194    | 1.5180 | 0.7142 | 0.6022  | -0.4856 |
| <b>mmu-miR-34b-5p</b>   | 85.6576    | 85.0584    | 63.1728   | 119.2999   | 1.3559 | 0.7130 | 0.4393  | -0.4881 |
| <b>mmu-miR-299a-3p</b>  | 2.2944     | 3.8346     | 1.7712    | 5.386      | 1.2954 | 0.7120 | 0.3734  | -0.4901 |

|                        |            |            |            |            |        |        |         |         |
|------------------------|------------|------------|------------|------------|--------|--------|---------|---------|
| <b>mmu-let-7c-5p</b>   | 6786.4528  | 11957.3286 | 14089.896  | 16862.2195 | 0.4817 | 0.7091 | -1.0539 | -0.4959 |
| <b>mmu-miR-342-3p</b>  | 398.4608   | 85.407     | 128.7072   | 121.4543   | 3.0959 | 0.7032 | 1.6303  | -0.5080 |
| <b>mmu-miR-322-5p</b>  | 148.3712   | 294.9156   | 61.6968    | 422.5317   | 2.4048 | 0.6980 | 1.2659  | -0.5188 |
| <b>mmu-miR-29c-3p</b>  | 28.68      | 65.5368    | 30.7008    | 93.9857    | 0.9342 | 0.6973 | -0.0982 | -0.5201 |
| <b>mmu-miR-497-5p</b>  | 68.4496    | 172.2084   | 15.0552    | 249.6411   | 4.5466 | 0.6898 | 2.1848  | -0.5357 |
| <b>mmu-miR-1839-5p</b> | 104.7776   | 106.6716   | 213.7248   | 154.8475   | 0.4902 | 0.6889 | -1.0284 | -0.5377 |
| <b>mmu-miR-19b-3p</b>  | 112.808    | 128.2848   | 67.0104    | 186.8942   | 1.6834 | 0.6864 | 0.7514  | -0.5429 |
| <b>mmu-miR-184-3p</b>  | 33.2688    | 15.3384    | 27.4536    | 22.3519    | 1.2118 | 0.6862 | 0.2772  | -0.5432 |
| <b>mmu-miR-103-3p</b>  | 684.8784   | 656.4138   | 773.1288   | 961.9396   | 0.8859 | 0.6824 | -0.1749 | -0.5513 |
| <b>mmu-miR-195a-3p</b> | 14.5312    | 23.7048    | 15.9408    | 34.7397    | 0.9116 | 0.6824 | -0.1336 | -0.5514 |
| <b>mmu-miR-99a-5p</b>  | 460.0272   | 356.2692   | 761.0256   | 524.3271   | 0.6045 | 0.6795 | -0.7262 | -0.5575 |
| <b>mmu-miR-190a-5p</b> | 4.9712     | 9.0636     | 2.0664     | 13.465     | 2.4057 | 0.6731 | 1.2665  | -0.5711 |
| <b>mmu-miR-582-5p</b>  | 3.0592     | 18.8244    | 3.2472     | 28.0072    | 0.9421 | 0.6721 | -0.0860 | -0.5732 |
| <b>mmu-miR-27b-5p</b>  | 13.7664    | 25.4478    | 21.5496    | 37.9713    | 0.6388 | 0.6702 | -0.6465 | -0.5774 |
| <b>mmu-miR-22-3p</b>   | 5982.648   | 7482.0018  | 10954.5768 | 11216.0757 | 0.5461 | 0.6671 | -0.8727 | -0.5841 |
| <b>mmu-miR-335-5p</b>  | 6.1184     | 12.5496    | 2.0664     | 18.851     | 2.9609 | 0.6657 | 1.5660  | -0.5870 |
| <b>mmu-miR-199a-3p</b> | 1659.9984  | 2924.0568  | 1147.1472  | 4397.3997  | 1.4471 | 0.6650 | 0.5331  | -0.5887 |
| <b>mmu-let-7f-5p</b>   | 11215.0272 | 18096.8718 | 32925.7224 | 27305.6735 | 0.3406 | 0.6628 | -1.5538 | -0.5935 |
| <b>mmu-miR-500-3p</b>  | 13.0016    | 8.0178     | 10.6272    | 12.1185    | 1.2234 | 0.6616 | 0.2909  | -0.5959 |
| <b>mmu-miR-362-3p</b>  | 33.2688    | 36.603     | 12.3984    | 55.7451    | 2.6833 | 0.6566 | 1.4240  | -0.6069 |
| <b>mmu-miR-130a-3p</b> | 107.8368   | 159.6588   | 70.5528    | 243.9858   | 1.5285 | 0.6544 | 0.6121  | -0.6118 |
| <b>mmu-miR-503-5p</b>  | 2.6768     | 5.5776     | 0.5904     | 8.6176     | 4.5339 | 0.6472 | 2.1807  | -0.6276 |
| <b>mmu-miR-140-3p</b>  | 2.2944     | 8.3664     | 3.8376     | 12.9264    | 0.5979 | 0.6472 | -0.7421 | -0.6276 |
| <b>mmu-miR-1983</b>    | 3.0592     | 2.4402     | 6.7896     | 3.7702     | 0.4506 | 0.6472 | -1.1502 | -0.6276 |
| <b>mmu-miR-181c-3p</b> | 64.2432    | 66.5826    | 100.0728   | 103.4112   | 0.6420 | 0.6439 | -0.6394 | -0.6352 |
| <b>mmu-miR-1198-5p</b> | 25.6208    | 13.5954    | 7.38       | 21.544     | 3.4717 | 0.6311 | 1.7956  | -0.6642 |
| <b>mmu-miR-199b-5p</b> | 294.0656   | 880.5636   | 84.132     | 1395.5126  | 3.4953 | 0.6310 | 1.8054  | -0.6643 |
| <b>mmu-miR-146a-5p</b> | 1086.7808  | 417.2742   | 648.5544   | 663.5552   | 1.6757 | 0.6288 | 0.7448  | -0.6692 |
| <b>mmu-miR-22-5p</b>   | 3.4416     | 23.7048    | 2.6568     | 37.9713    | 1.2954 | 0.6243 | 0.3734  | -0.6797 |
| <b>mmu-miR-26b-5p</b>  | 949.1168   | 797.5968   | 1326.3336  | 1279.7136  | 0.7156 | 0.6233 | -0.4828 | -0.6821 |
| <b>mmu-miR-27b-3p</b>  | 12894.528  | 14036.0304 | 16209.1368 | 22528.8301 | 0.7955 | 0.6230 | -0.3300 | -0.6826 |

|                          |             |             |             |             |         |        |         |         |
|--------------------------|-------------|-------------|-------------|-------------|---------|--------|---------|---------|
| <b>mmu-let-7i-5p</b>     | 4287.8512   | 7342.2132   | 6255.288    | 11801.2646  | 0.6855  | 0.6222 | -0.5448 | -0.6847 |
| <b>mmu-miR-28a-3p</b>    | 236.7056    | 244.3686    | 275.4216    | 393.7166    | 0.8594  | 0.6207 | -0.2185 | -0.6881 |
| <b>mmu-miR-340-5p</b>    | 2152.1472   | 2762.3064   | 4417.668    | 4484.9222   | 0.4872  | 0.6159 | -1.0375 | -0.6992 |
| <b>mmu-miR-128-3p</b>    | 17.9728     | 13.2468     | 13.8744     | 21.544      | 1.2954  | 0.6149 | 0.3734  | -0.7016 |
| <b>mmu-miR-130a-5p</b>   | 5.3536      | 3.1374      | 0.2952      | 5.1167      | 18.1355 | 0.6132 | 4.1807  | -0.7056 |
| <b>mmu-miR-9-5p</b>      | 2.2944      | 3.1374      | 7.38        | 5.1167      | 0.3109  | 0.6132 | -1.6855 | -0.7056 |
| <b>mmu-miR-410-3p</b>    | 68.4496     | 91.3332     | 87.3792     | 150.808     | 0.7834  | 0.6056 | -0.3522 | -0.7235 |
| <b>mmu-miR-30a-5p</b>    | 494.0608    | 708.3552    | 474.0912    | 1170.6471   | 1.0421  | 0.6051 | 0.0595  | -0.7248 |
| <b>mmu-miR-99b-5p</b>    | 2536.4592   | 429.8238    | 1636.2936   | 712.5678    | 1.5501  | 0.6032 | 0.6324  | -0.7293 |
| <b>mmu-miR-324-5p</b>    | 6.5008      | 14.2926     | 6.4944      | 23.6984     | 1.0010  | 0.6031 | 0.0014  | -0.7295 |
| <b>mmu-miR-378a-5p</b>   | 20.6496     | 29.9796     | 9.1512      | 49.8205     | 2.2565  | 0.6018 | 1.1741  | -0.7328 |
| <b>mmu-miR-181d-5p</b>   | 275.328     | 234.9564    | 243.2448    | 390.485     | 1.1319  | 0.6017 | 0.1787  | -0.7329 |
| <b>mmu-miR-181b-5p</b>   | 171.6976    | 247.8546    | 133.4304    | 414.9913    | 1.2868  | 0.5973 | 0.3638  | -0.7436 |
| <b>mmu-miR-221-3p</b>    | 262.3264    | 257.964     | 188.928     | 432.2265    | 1.3885  | 0.5968 | 0.4735  | -0.7446 |
| <b>mmu-miR-1247-3p</b>   | 4.2064      | 5.9262      | 5.904       | 9.9641      | 0.7125  | 0.5948 | -0.4891 | -0.7496 |
| <b>mmu-miR-30e-5p</b>    | 68.4496     | 107.0202    | 62.5824     | 181.7775    | 1.0938  | 0.5887 | 0.1293  | -0.7643 |
| <b>mmu-miR-29a-5p</b>    | 4.5888      | 3.486       | 1.476       | 5.9246      | 3.1089  | 0.5884 | 1.6364  | -0.7651 |
| <b>mmu-miR-132-3p</b>    | 12.6192     | 13.944      | 9.7416      | 23.9677     | 1.2954  | 0.5818 | 0.3734  | -0.7814 |
| <b>mmu-miR-199a-5p</b>   | 341.8656    | 573.7956    | 182.4336    | 991.024     | 1.8739  | 0.5790 | 0.9061  | -0.7884 |
| <b>mmu-miR-181c-5p</b>   | 1173.5856   | 2036.5212   | 2130.4584   | 3525.6756   | 0.5509  | 0.5776 | -0.8602 | -0.7918 |
| <b>mmu-miR-341-3p</b>    | 10.3248     | 11.5038     | 13.8744     | 19.9282     | 0.7442  | 0.5773 | -0.4263 | -0.7927 |
| <b>mmu-miR-669a-5p</b>   | 19.8848     | 3.8346      | 13.8744     | 6.7325      | 1.4332  | 0.5696 | 0.5192  | -0.8121 |
| <b>mmu-miR-125b-1-3p</b> | 4.2064      | 5.9262      | 2.952       | 10.5027     | 1.4249  | 0.5643 | 0.5109  | -0.8256 |
| <b>mmu-miR-98-5p</b>     | 1186.9696   | 2292.045    | 516.8952    | 4070.4695   | 2.2963  | 0.5631 | 1.1993  | -0.8286 |
| <b>mmu-miR-24-3p</b>     | 47.0352     | 71.1144     | 22.4352     | 127.1096    | 2.0965  | 0.5595 | 1.0680  | -0.8379 |
| <b>mmu-miR-27a-3p</b>    | 2416.3856   | 884.7468    | 3305.0592   | 1623.6097   | 0.7311  | 0.5449 | -0.4518 | -0.8759 |
| <b>mmu-miR-449a-5p</b>   | 47.0352     | 14.6412     | 48.1176     | 26.93       | 0.9775  | 0.5437 | -0.0328 | -0.8792 |
| <b>mmu-miR-196b-3p</b>   | 3.0592      | 3.1374      | 0.2952      | 5.9246      | 10.3631 | 0.5296 | 3.3734  | -0.9171 |
| <b>mmu-miR-708-3p</b>    | 42.8288     | 50.1984     | 33.6528     | 95.0629     | 1.2727  | 0.5281 | 0.3479  | -0.9212 |
| <b>mmu-miR-202-5p</b>    | 134.9872    | 95.5164     | 69.372      | 181.2389    | 1.9458  | 0.5270 | 0.9604  | -0.9241 |
| <b>mmu-miR-143-3p</b>    | 111893.6816 | 102954.4782 | 141006.1176 | 195677.1502 | 0.7935  | 0.5261 | -0.3336 | -0.9265 |

|                         |           |           |           |            |        |        |         |         |
|-------------------------|-----------|-----------|-----------|------------|--------|--------|---------|---------|
| <b>mmu-miR-196b-5p</b>  | 3322.6736 | 1867.1016 | 3727.4904 | 3571.4566  | 0.8914 | 0.5228 | -0.1659 | -0.9357 |
| <b>mmu-miR-193b-3p</b>  | 69.9792   | 78.7836   | 82.3608   | 151.6159   | 0.8497 | 0.5196 | -0.2350 | -0.9445 |
| <b>mmu-miR-26b-3p</b>   | 5.3536    | 5.5776    | 3.5424    | 10.772     | 1.5113 | 0.5178 | 0.5958  | -0.9496 |
| <b>mmu-miR-203-3p</b>   | 44.7408   | 71.8116   | 180.3672  | 138.6895   | 0.2481 | 0.5178 | -2.0113 | -0.9496 |
| <b>mmu-miR-107-3p</b>   | 11.0896   | 8.0178    | 14.1696   | 15.6194    | 0.7826 | 0.5133 | -0.3536 | -0.9621 |
| <b>mmu-miR-34a-5p</b>   | 54.3008   | 54.3816   | 57.2688   | 106.3735   | 0.9482 | 0.5112 | -0.0768 | -0.9679 |
| <b>mmu-miR-21a-3p</b>   | 4.2064    | 1.743     | 4.7232    | 3.5009     | 0.8906 | 0.4979 | -0.1672 | -1.0062 |
| <b>mmu-miR-129-2-3p</b> | 9.1776    | 10.1094   | 2.3616    | 20.4668    | 3.8862 | 0.4939 | 1.9584  | -1.0176 |
| <b>mmu-miR-409-3p</b>   | 19.5024   | 17.7786   | 18.5976   | 36.0862    | 1.0487 | 0.4927 | 0.0685  | -1.0213 |
| <b>mmu-miR-30b-3p</b>   | 6.1184    | 2.0916    | 7.9704    | 4.3088     | 0.7676 | 0.4854 | -0.3815 | -1.0427 |
| <b>mmu-miR-193a-3p</b>  | 172.08    | 247.1574  | 129.5928  | 523.7885   | 1.3279 | 0.4719 | 0.4091  | -1.0836 |
| <b>mmu-miR-300-3p</b>   | 9.56      | 9.4122    | 7.6752    | 20.1975    | 1.2456 | 0.4660 | 0.3168  | -1.1016 |
| <b>mmu-miR-3057-5p</b>  | 3.824     | 1.743     | 3.2472    | 3.7702     | 1.1776 | 0.4623 | 0.2359  | -1.1131 |
| <b>mmu-miR-135b-5p</b>  | 3.4416    | 2.4402    | 5.904     | 5.386      | 0.5829 | 0.4531 | -0.7786 | -1.1422 |
| <b>mmu-miR-338-3p</b>   | 0.7648    | 4.1832    | 5.0184    | 9.4255     | 0.1524 | 0.4438 | -2.7141 | -1.1720 |
| <b>mmu-miR-196a-5p</b>  | 252.0016  | 152.6868  | 282.2112  | 346.0505   | 0.8930 | 0.4412 | -0.1633 | -1.1804 |
| <b>mmu-miR-708-5p</b>   | 217.968   | 178.4832  | 178.596   | 409.0667   | 1.2205 | 0.4363 | 0.2874  | -1.1965 |
| <b>mmu-miR-214-5p</b>   | 87.5696   | 53.6844   | 145.8288  | 126.8403   | 0.6005 | 0.4232 | -0.7358 | -1.2404 |
| <b>mmu-miR-322-3p</b>   | 3.824     | 3.486     | 1.7712    | 8.3483     | 2.1590 | 0.4176 | 1.1104  | -1.2599 |
| <b>mmu-miR-106b-3p</b>  | 6.1184    | 2.7888    | 11.2176   | 6.7325     | 0.5454 | 0.4142 | -0.8745 | -1.2715 |
| <b>mmu-miR-335-3p</b>   | 8.0304    | 9.0636    | 6.4944    | 22.6212    | 1.2365 | 0.4007 | 0.3063  | -1.3195 |
| <b>mmu-miR-542-3p</b>   | 11.0896   | 6.972     | 8.5608    | 18.851     | 1.2954 | 0.3698 | 0.3734  | -1.4350 |
| <b>mmu-miR-129-5p</b>   | 9.9424    | 6.2748    | 8.2656    | 17.5045    | 1.2029 | 0.3585 | 0.2665  | -1.4801 |
| <b>mmu-miR-145a-5p</b>  | 3002.9872 | 4793.5986 | 1614.4488 | 13542.2891 | 1.8601 | 0.3540 | 0.8954  | -1.4983 |
| <b>mmu-miR-700-5p</b>   | 4.9712    | 1.3944    | 2.0664    | 4.0395     | 2.4057 | 0.3452 | 1.2665  | -1.5345 |
| <b>mmu-miR-134-5p</b>   | 5.736     | 5.229     | 10.332    | 19.1203    | 0.5552 | 0.2735 | -0.8490 | -1.8705 |
| <b>mmu-miR-377-3p</b>   | 0.3824    | 0.6972    | 2.3616    | 2.9623     | 0.1619 | 0.2354 | -2.6266 | -2.0871 |
| <b>mmu-miR-143-5p</b>   | 34.416    | 22.3104   | 84.7224   | 95.6015    | 0.4062 | 0.2334 | -1.2997 | -2.0993 |

**Table S2.** Rates of cytoplasmic droplets (CD) after sperm co-incubation with HTF (as control) and OVS for 30 min and 3h. Using  $\chi^2$  analysis, there is no significant ( $P > 0.05$ ) difference between samples after co-incubation with OVS and HTF for different time periods.

| <b>Incubation time</b> | <b>Status</b> | <b>Number (%)</b> |            |
|------------------------|---------------|-------------------|------------|
|                        |               | <b>HTF</b>        | <b>OVS</b> |
| <b>30 min</b>          | <b>No CD</b>  | 162               | 194        |
|                        | <b>CD</b>     | 11 (6.4)          | 18 (8.5)   |
|                        | <b>Total</b>  | 173               | 212        |
| <b>3 h</b>             | <b>No CD</b>  | 199               | 184        |
|                        | <b>CD</b>     | 10 (4.8)          | 15 (7.5)   |
|                        | <b>Total</b>  | 209               | 199        |
| <b>Grand Total</b>     | <b>No CD</b>  | 361               | 378        |
|                        | <b>CD</b>     | 21 (5.8)          | 33 (8.7)   |
|                        | <b>Total</b>  | 382               | 411        |



**Table S3. Primers used for amplification of reverse-transcribed RNAs.**

| Assay Name                 | U6 as an endogenous control and selected miRNA Sequence (5' to 3')                                                 | Accession Number (Exiqon Inc.) |
|----------------------------|--------------------------------------------------------------------------------------------------------------------|--------------------------------|
| <i>U6 snRNA (hsa, mmu)</i> | GUGCUCGCUUCGGCAGCACAUUAUACUAAAAUUGGAA<br>CGAUACAGAGAAGAUUAGCAUGGCCCCUGCGCAAGG<br>AUGACACGCAAUUCGUGAAGCGUCCAUAUUUUU | 203907                         |
| <i>miR-143-3p</i>          | UGAGAUGAAGCACUGUAGCUC                                                                                              | 205992                         |
| <i>miR-34c-5p</i>          | AGGCAGUGUAGUUAGCUGAUUGC                                                                                            | 205659                         |
| <i>miR-22-3p</i>           | AAGCUGCCAGUUGAAGAACUGU                                                                                             | 204606                         |
| <i>let-7a-5p</i>           | UGAGGUAGUAGGUUGUAUAGUU                                                                                             | 205727                         |

**Table S4. Primers for conventional RT-PCR.**

| Gene            | Forward Primer Sequence | Reverse Primer Sequence | Product Size (kbp) |
|-----------------|-------------------------|-------------------------|--------------------|
| <i>U6 snRNA</i> | CGCTTCGGCAGCACATATAC    | AAATATGGAACGCTTCACGA    | 100                |
| <i>Rnu5g</i>    | CTCTGGTTTCTCTTCAGATCGT  | TTGTCAAGACAAGGCCTCAA    | 109                |
| <i>Rnu1a1</i>   | GATCACGAAGGTGGTTTTCC    | CAGTCCCCCACTACCACAAA    | 119                |
| <i>Gapdh</i>    | CCGCATCTTCTTGTGCAGT     | GAATTTGCCCGTGAGTGGAGT   | 204                |
